# Supplementary material for: Silver vanadium oxide@water-pillared vanadium oxide coaxial nanocables for superior zinc ion storage properties
Source: Royal Society of Chemistry journal article supplement (doi:10.1039/c9qi00559e), 2019-01-01
Supplement: c9qi00559e1.pdf [file c9qi00559e1.pdf]

*Electronic Supplementary Information (ESI) for*

## **Silver vanadium oxide@water-pillared vanadium oxide coaxial nanocables for superior zinc-ion storage properties**

Jing Zeng<sup>†,a</sup> Kun Chao<sup>†,b</sup> Wenquan Wang,<sup>a</sup> Xin Wei,<sup>a</sup> Chenyang Liu,<sup>a</sup> Hongrui Peng,<sup>a</sup> Zhonghua Zhang,<sup>a</sup> Xiaosong Guo<sup>\*a</sup> and Guicun Li<sup>\*a</sup>

<sup>a</sup>College of Materials Science and Engineering, Qingdao University of Science and Technology, Qingdao 266042, China

<sup>b</sup>College of Electromechanical Engineering, Qingdao University of Science and Technology, Qingdao 266042, China

E-mail: [guicunli@qust.edu.cn](mailto:guicunli@qust.edu.cn), [guoxs06@126.com](mailto:guoxs06@126.com)

### **This profile contains following contents.**

**Fig. S1** TEM images of the  $\text{Ag}_{0.333}\text{V}_2\text{O}_5@V_2\text{O}_5 \cdot n\text{H}_2\text{O}$  coaxial nanocables.

**Fig. S2** TEM and HRTEM images of  $V_2\text{O}_5/V_2\text{O}_5 \cdot n\text{H}_2\text{O}$  (a and b) and  $\text{Ag}_{0.333}\text{V}_2\text{O}_5$  (c and d).

**Fig. S3** TEM-EDS image of the elemental distributions of O in  $\text{Ag}_{0.333}\text{V}_2\text{O}_5@V_2\text{O}_5 \cdot n\text{H}_2\text{O}$ .

**Fig. S4** EDS spectrum of the  $\text{Ag}_{0.333}\text{V}_2\text{O}_5@V_2\text{O}_5 \cdot n\text{H}_2\text{O}$  coaxial nanocables.

**Table S1** The detailed analysis data in XPS experiments for varied elements.

**Fig. S5** The first cycle discharge-charge profiles of (a)  $\text{Ag}_{0.333}\text{V}_2\text{O}_5@V_2\text{O}_5 \cdot n\text{H}_2\text{O}$ ; (b)  $\text{Ag}_{0.333}\text{V}_2\text{O}_5$ ; and (c)  $V_2\text{O}_5/V_2\text{O}_5 \cdot n\text{H}_2\text{O}$ .

**Fig. S6** Nyquist impedance plots of varied electrodes fresh cells.

**Fig. S7** Discharge–charge curves of the  $\text{Ag}_{0.333}\text{V}_2\text{O}_5@V_2\text{O}_5 \cdot n\text{H}_2\text{O}$  cathode at different current densities.

**Fig. S8** SEM images of  $\text{Ag}_{0.333}\text{V}_2\text{O}_5@V_2\text{O}_5 \cdot n\text{H}_2\text{O}$  cathode after 100 cycles at  $0.5 \text{ A g}^{-1}$ .

**Fig. S9** SEM images of initial  $\text{Ag}_{0.333}\text{V}_2\text{O}_5@V_2\text{O}_5 \cdot n\text{H}_2\text{O}$  cathode (a and b); and after cycled  $\text{Ag}_{0.333}\text{V}_2\text{O}_5@V_2\text{O}_5 \cdot n\text{H}_2\text{O}$  cathode (c and d); The insets in part a and c shows the status of the electrodes.

**Fig. S10** The long-time cycling performance of the electrodes for comparison at  $3.0 \text{ A g}^{-1}$ .

**Fig. S11** EDS images of the thick  $\text{Ag}_{0.333}\text{V}_2\text{O}_5@V_2\text{O}_5 \cdot n\text{H}_2\text{O}$  electrode.

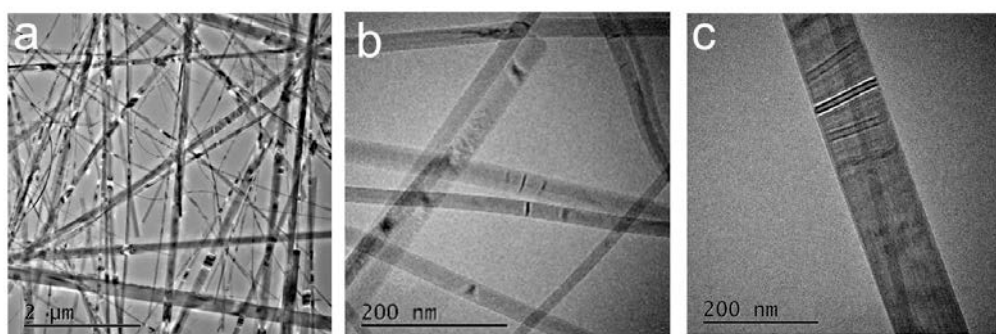

**Fig. S1** TEM images (a,b and c) of the  $\text{Ag}_{0.333}\text{V}_2\text{O}_5@V_2\text{O}_5 \cdot n\text{H}_2\text{O}$  coaxial nanocables.

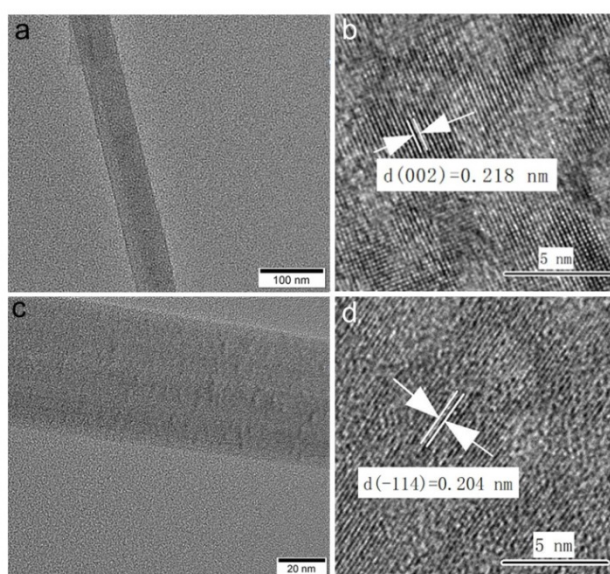

**Fig. S2** Typical TEM and HRTEM images of  $V_2\text{O}_5/V_2\text{O}_5 \cdot n\text{H}_2\text{O}$  (a and b) and  $\text{Ag}_{0.333}\text{V}_2\text{O}_5$  (c and

d).

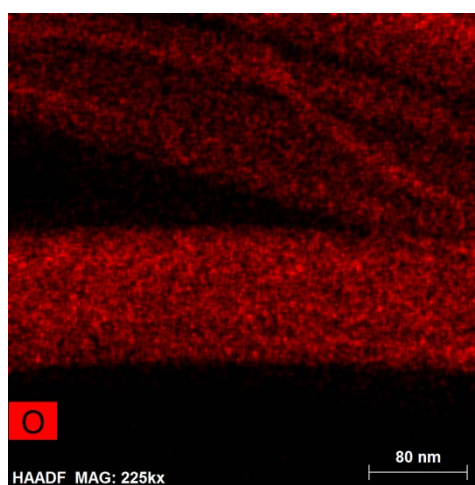

Fig. S3 TEM-EDS image of the elemental distributions of O in  $\text{Ag}_{0.333}\text{V}_2\text{O}_5@ \text{V}_2\text{O}_5 \cdot n\text{H}_2\text{O}$ .

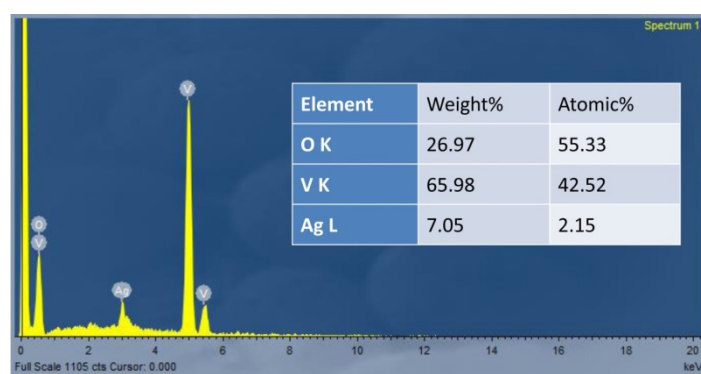

Fig. S4 EDS spectrum of the  $\text{Ag}_{0.333}\text{V}_2\text{O}_5@ \text{V}_2\text{O}_5 \cdot n\text{H}_2\text{O}$  coaxial nanocables.

The EDS result demonstrated the atomic ratio of Ag to V is about 0.05, which is consistent with the results of XPS (Table S1).

Table S1 The detailed analysis data in XPS experiments for varied elements.

| Name | Start BE | Peak BE | End BE | Height CPS | FWHM eV | Area (P) CPS.eV | Area (N) TPP-2M | Atomic % |
|------|----------|---------|--------|------------|---------|-----------------|-----------------|----------|
| C1s  | 293.83   | 284.79  | 280.83 | 10708.22   | 1.56    | 22954.87        | 0.29            | 23.92    |
| Ag3d | 378.48   | 367.82  | 364.23 | 10067.82   | 1.13    | 21629.04        | 0.01            | 1.05     |
| V2p  | 528.78   | 517.58  | 512.68 | 57820.53   | 1.38    | 147450.9        | 0.22            | 17.92    |
| O1s  | 543.98   | 530.41  | 527.88 | 72386.79   | 1.54    | 145134.67       | 0.69            | 57.11    |

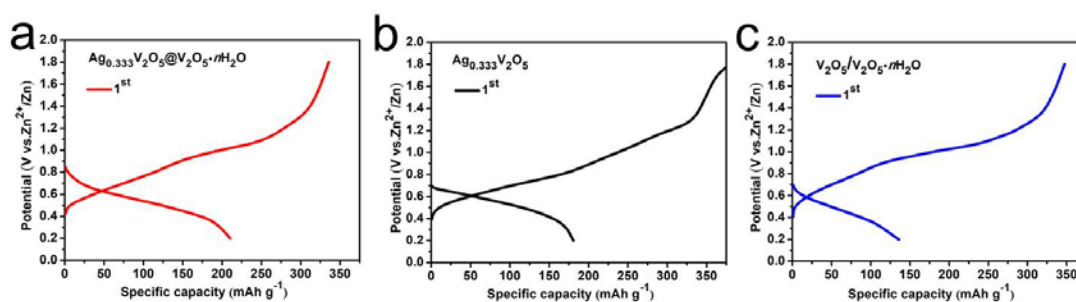

Fig. S5 The first cycle discharge-charge profiles of (a)  $\text{Ag}_{0.333}\text{V}_2\text{O}_5@V_2\text{O}_5 \cdot n\text{H}_2\text{O}$ ; (b)  $\text{Ag}_{0.333}\text{V}_2\text{O}_5$ ; and (c)  $V_2\text{O}_5/V_2\text{O}_5 \cdot n\text{H}_2\text{O}$ .

The first cycle discharge-charge specific capacity of  $\text{Ag}_{0.333}\text{V}_2\text{O}_5@V_2\text{O}_5 \cdot n\text{H}_2\text{O}$  ( $210.18 \text{ mAh g}^{-1}$  at  $0.5 \text{ A g}^{-1}$ ),  $\text{Ag}_{0.333}\text{V}_2\text{O}_5$  ( $180.56 \text{ mAh g}^{-1}$  at  $0.2 \text{ A g}^{-1}$ ),  $V_2\text{O}_5/V_2\text{O}_5 \cdot n\text{H}_2\text{O}$  ( $135.03 \text{ mAh g}^{-1}$  at  $0.2 \text{ A g}^{-1}$ ) are shown in Fig. S4, respectively.

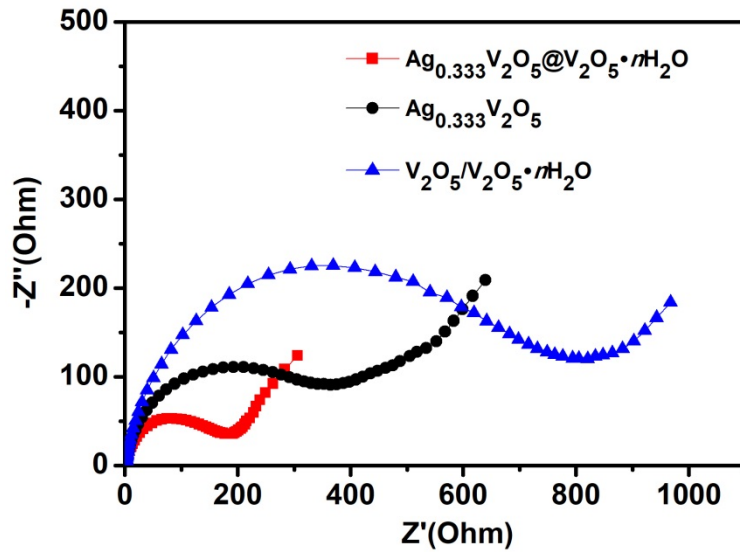

Fig. S6 Nyquist impedance plots of varied electrodes fresh cells.

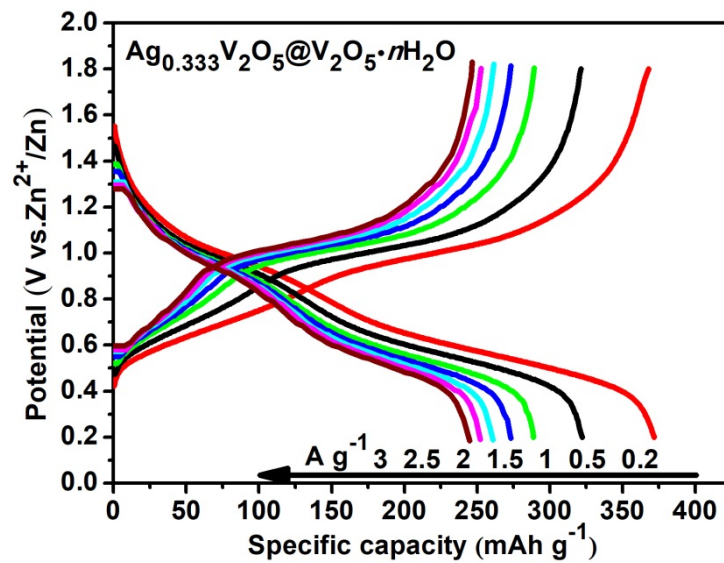

Fig. S7 Discharge-charge curves of the  $\text{Ag}_{0.333}\text{V}_2\text{O}_5@V_2\text{O}_5 \cdot n\text{H}_2\text{O}$  cathode at different current densities.

The discharge-charge curves of the  $\text{Ag}_{0.333}\text{V}_2\text{O}_5@V_2\text{O}_5 \cdot n\text{H}_2\text{O}$  cathode at different current densities shows in Fig. S6. The charge-discharge curves features are kept well, even in a higher current density of  $3.0 \text{ A g}^{-1}$ . The specific capacities  $373.3, 322.5, 290.62, 274.18, 262.72, 253.76$  and  $245.9 \text{ mAh g}^{-1}$  are obtained at  $0.2, 0.5, 1.0, 1.5, 2.0, 2.5$  and  $3.0 \text{ A g}^{-1}$ , respectively.

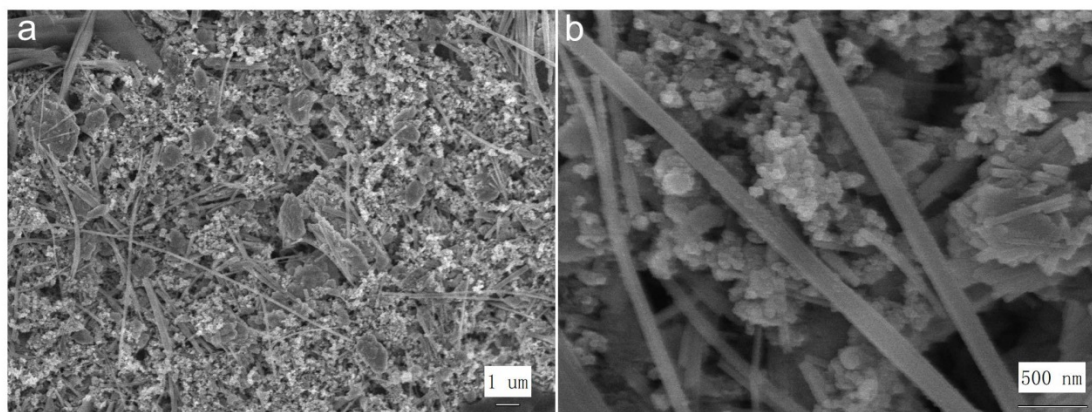

Fig. S8 SEM images of  $\text{Ag}_{0.333}\text{V}_2\text{O}_5@V_2\text{O}_5 \cdot n\text{H}_2\text{O}$  cathode after 100 cycles at  $0.5 \text{ A g}^{-1}$ .

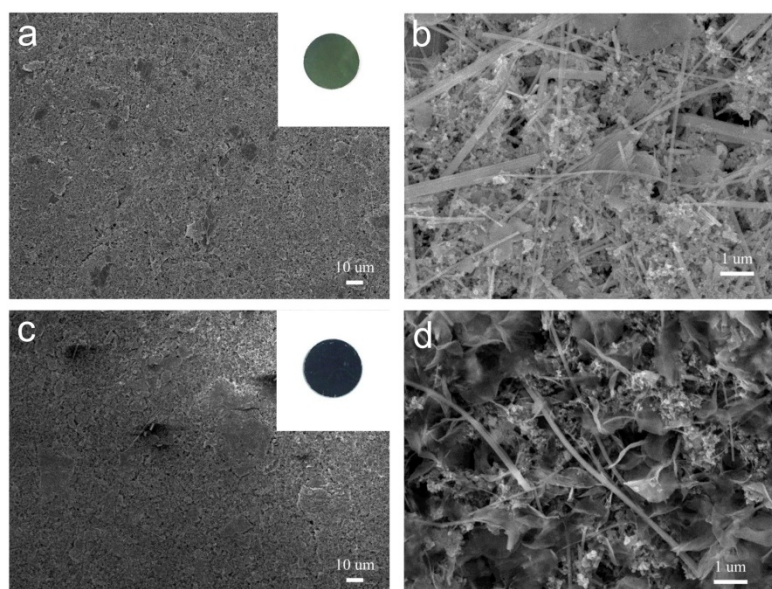

Fig. S9 SEM images of initial  $\text{Ag}_{0.333}\text{V}_2\text{O}_5@V_2\text{O}_5 \cdot n\text{H}_2\text{O}$  cathode (a and b); and after cycled  $\text{Ag}_{0.333}\text{V}_2\text{O}_5@V_2\text{O}_5 \cdot n\text{H}_2\text{O}$  cathode (c and d); The insets in part a and c shows the status of the electrodes.

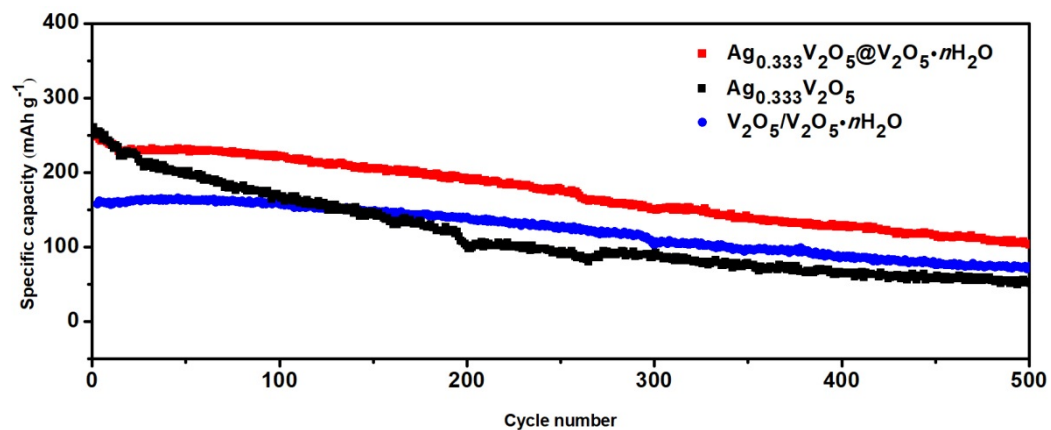

Fig. S10 The long-term cycling performance of the electrodes for comparison at  $3.0 \text{ A g}^{-1}$ .

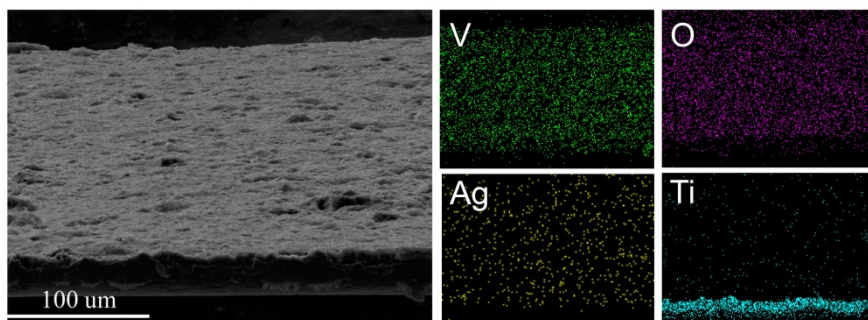

Fig. S11 EDS images of the thick  $\text{Ag}_{0.333}\text{V}_2\text{O}_5@V_2\text{O}_5 \cdot n\text{H}_2\text{O}$  electrode.
